# Supplementary material
Source: Springer Nature journal article supplement (https://www.springermedizin.de/resource/supplementary/13019_2011_426_MOESM1_ESM.pdf/9638646)

Freedom from reoperation

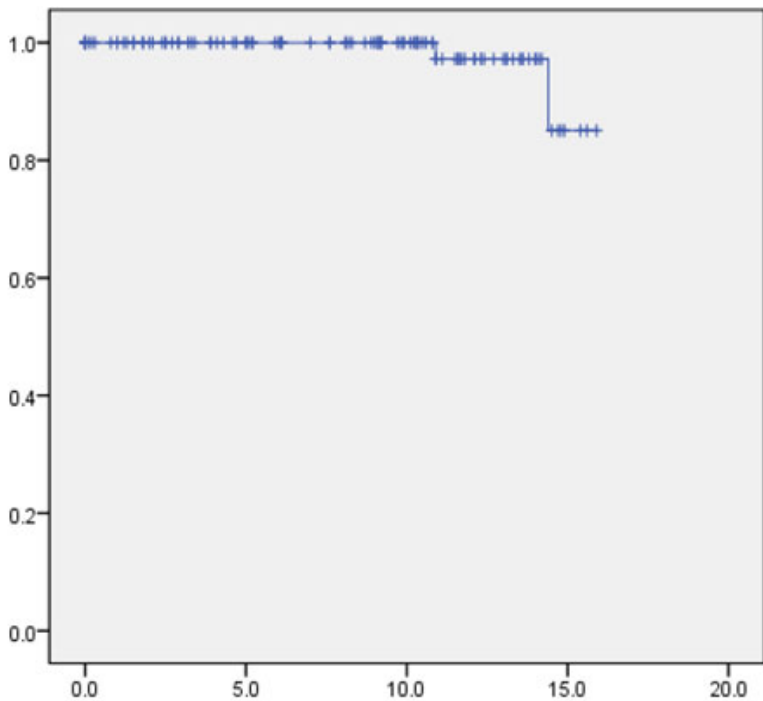

Follow up/Years

Supplement: MOESM1 [file 9638646]
